# Supplementary material for: Gallium–indium bimetal sites in the indium–gallium metal organic framework for efficient electrocatalytic reduction of carbon dioxide into formate
Source: Royal Society of Chemistry journal article supplement (doi:10.1039/d4ta00270a), 2024-01-01
Supplement: d4ta00270a1.pdf [file d4ta00270a1.pdf]

1 **Gallium-introduced bimetal sites in indium-gallium metal organic framework for**  
2 **efficient electrocatalytic reduction of carbon dioxide into formate**

3

4 Yang Gao, He Xiao\*, Xiaofang Ma, Zhizhu Yue, Chunmei Liu, Man Zhao, Li Zhang,  
5 Junming Zhang, Ergui Luo, Tianjun Hu, Baoliang Lv, Jianfeng Jia\* and Haishun Wu\*  
6 Key Laboratory of Magnetic Molecules & Magnetic Information Materials Ministry of  
7 Education, The School of Chemical and Material Science, Shanxi Normal University,  
8 Taiyuan 030000, China.

9 \* Corresponding author

10

11 E-mail: gaoyang9808@126.com (Y. Gao); xiaohe200808@sxnu.edu.cn (H. Xiao);  
12 1739266658@qq.com (X.F. Ma); yuezhizhu712@163.com (Z.Z. Yue);  
13 lcm1553540@163.com (C.M. Liu); zm03030225@sxnu.edu.cn (M. Zhao);  
14 zhangli603606@163.com (L. Zhang); zhangjunming@sxnu.edu.cn (J.M. Zhang);  
15 luogui1991@sxnu.edu.cn (E.G. Luo); hutj@sxnu.edu.cn (T.J. Hu); lvbl@sxnu.edu.cn  
16 (B.L. Lv); jiajf@dns.sxnu.edu.cn (J.F. Jia); wuhs@dns.sxnu.edu.cn (H.S. Wu).

17

18

19 **1. Chemicals and materials**

20 Gallium Trinitrate Hydrate (III) ( $\text{Ga}(\text{NO}_3)_3 \cdot x\text{H}_2\text{O}$ , 99.99%) and Indium (III)  
21 Nitrate Hydrate ( $\text{In}(\text{NO}_3)_3 \cdot x\text{H}_2\text{O}$ , 99.9%) were purchased from Adamas-beta. P-  
22 Phthalic acid (PTA, 99%) was purchased from Aladdin Scientific Corp. N, N-  
23 dimethylformamide (DMF, 99.5%) was purchased from Tianjin Beichen Fangzheng  
24 Reagent Factory (China). Anhydrous ethanol ( $\text{C}_2\text{H}_5\text{OH}$ , 99.7%) was purchased from  
25 Guangfu Technology Co., Ltd. Potassium bicarbonate ( $\text{KHCO}_3$ , 99.5%) was purchased  
26 from Tianjin Kemiou Chemical Reagent Co., Ltd (China). Deionized water (DI water,  
27 18.25 M $\Omega$ ) produced by a UPR-II-100 L water purification system was used in this  
28 work. All the chemical reagents are analytical grade and used as received without  
29 further purification.

30

1 **2. The turnover frequency (TOF, s<sup>-1</sup>)**

2 TOF of the electrocatalyst was calculated according to the formula:

3 
$$TOF = \frac{n \div t}{m_{cat} \times \omega \div M_{In}}$$

4 *n*: the molar yield of formate, mol.

5 *t*: operation time for eCO<sub>2</sub>RR, s.

6 *m*<sub>cat</sub>: catalyst mass in the electrode, g.

7 *ω*: In loading in the catalyst, wt%

8 *M*<sub>In</sub>: atomic mass of In, 114.82 g·mol<sup>-1</sup>.

9

### 1 3. Supplemental figures and tables

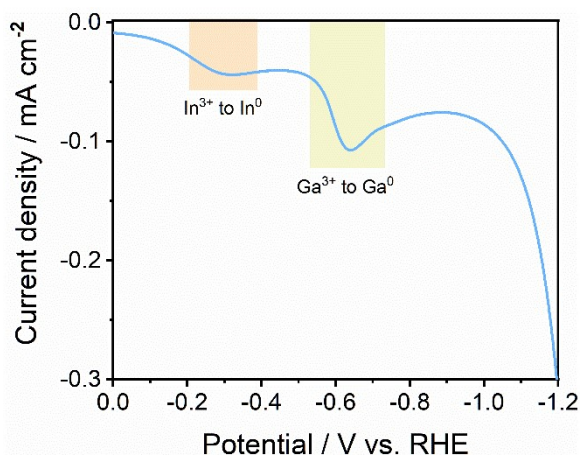

2 **Fig. S1** LSV curve of the solution after ion exchange.

3 The test utilized a mixture of 0.5 M KHCO<sub>3</sub> (25 mL) solution and the solution  
4 after ion exchange (5 mL) as the electrolyte. A Pt electrode served as the counter  
5 electrode, Ag/AgCl as the reference electrode, and a glassy carbon electrode as the  
6 working electrode. The results indicated that the reduction peak of In(III) to In(0)  
7 appeared near -0.3 V, while the reduction peak of Ga(III) to Ga(0) appeared near -0.6  
8 V.  
9

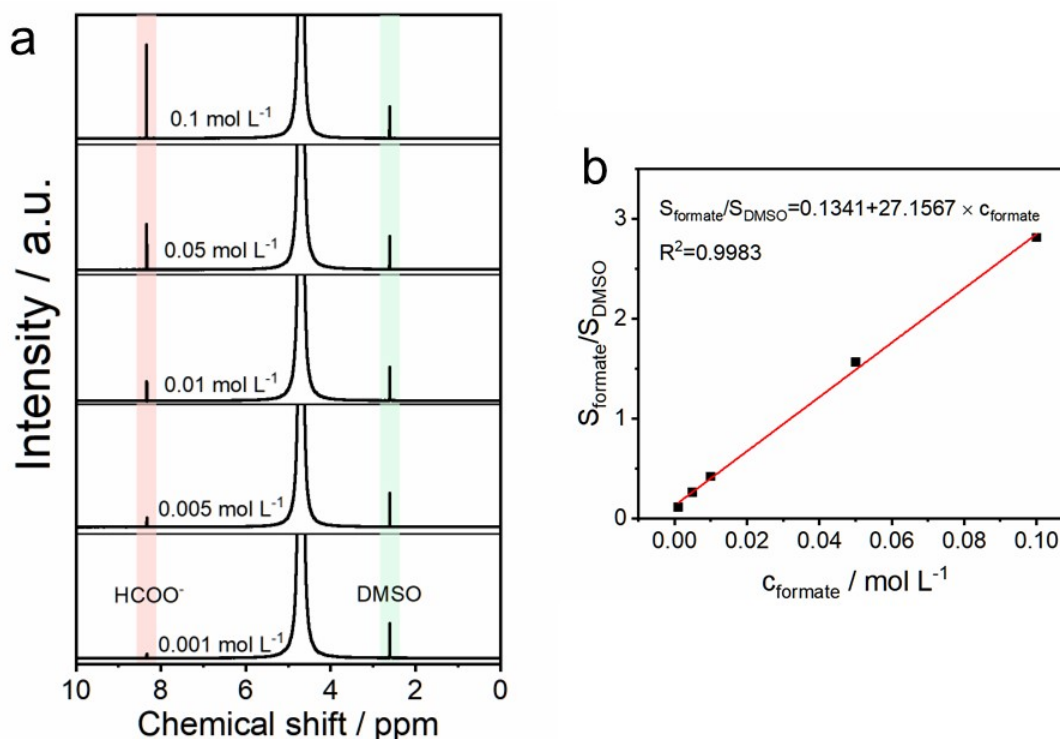

10 **Fig. S2** The standard curve for the formate product.

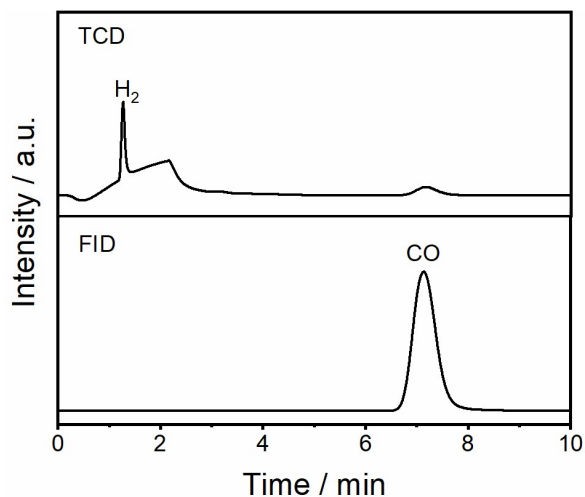

1 **Fig. S3** Gas-chromatography of gas product produced for eCO<sub>2</sub>RR.

2

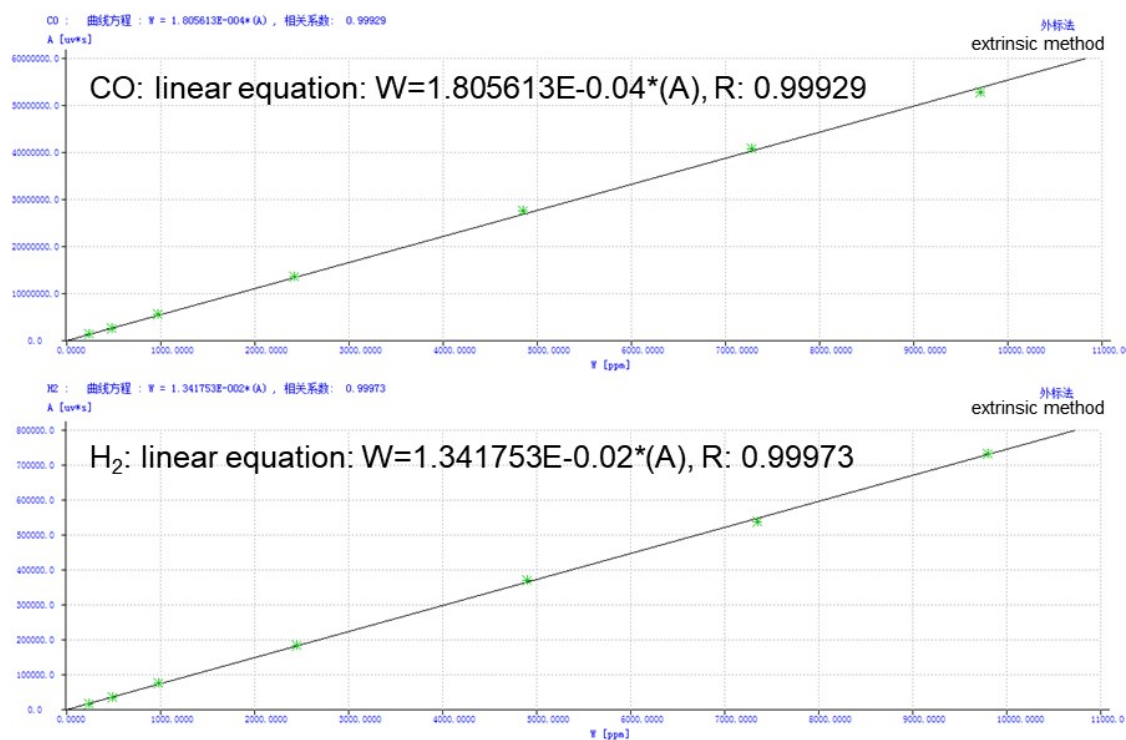

3 **Fig. S4** The standard curves for H<sub>2</sub> and CO product.

4

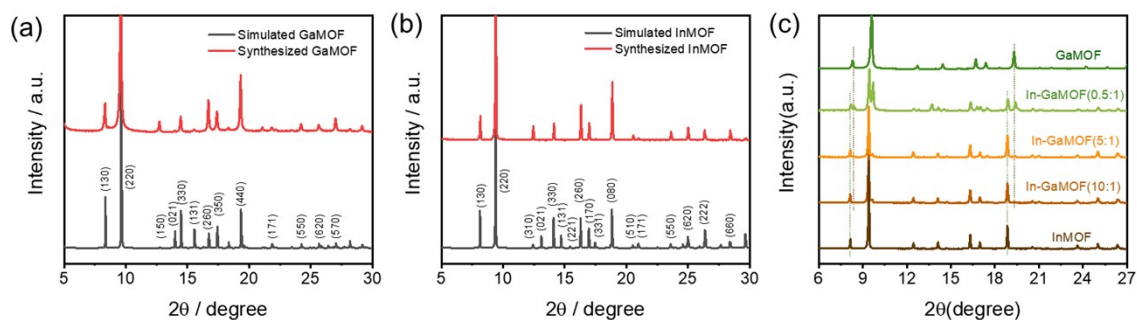

5

6 **Fig. S5** The simulated XRD of (a) GaMOF and (b) InMOF; (c) the XRD patterns of  
7 InGaMOFs with different In/Ga ratios.

1

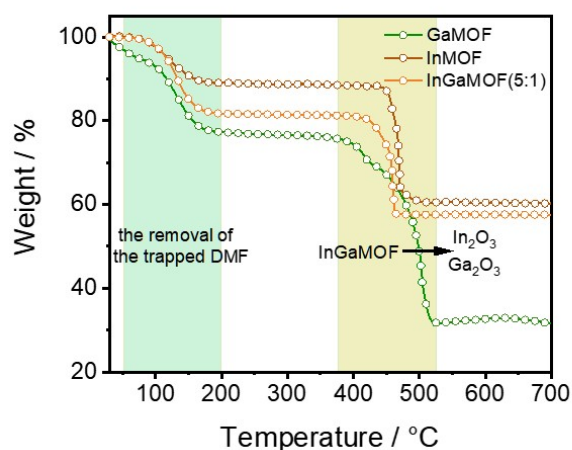

2

3 **Fig. S6** The TG curves of GaMOF, InMOF, and InGaMOF(5:1).

4

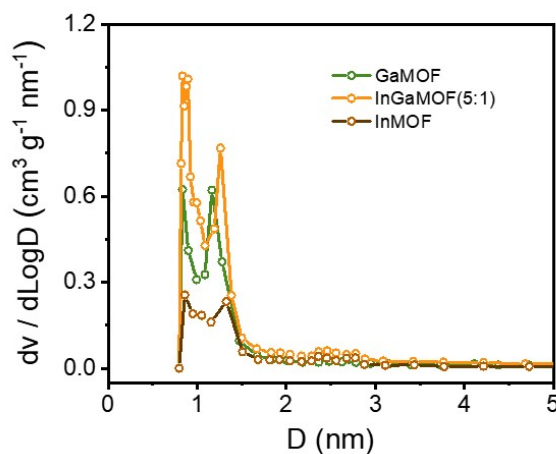

5

6 **Fig. S7** The pore size distribution calculated by NLDFT method for GaMOF, InMOF,  
7 and InGaMOF(5:1).

8

9

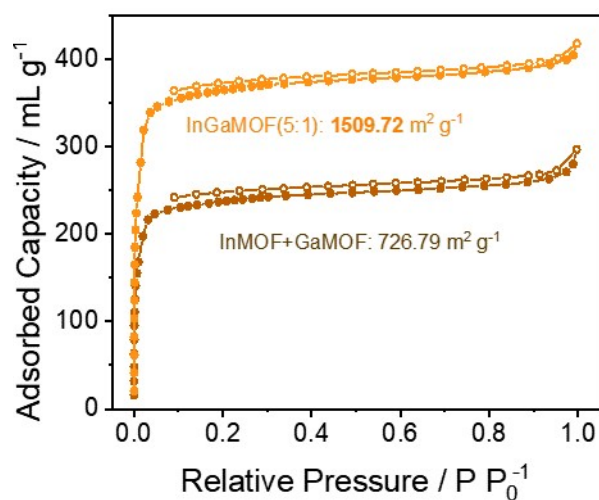

10 **Fig. S8** The N<sub>2</sub> adsorption-desorption isotherms of InGaMOF(5:1) and the physically  
11 mixed InMOF+GaMOF.

12

1

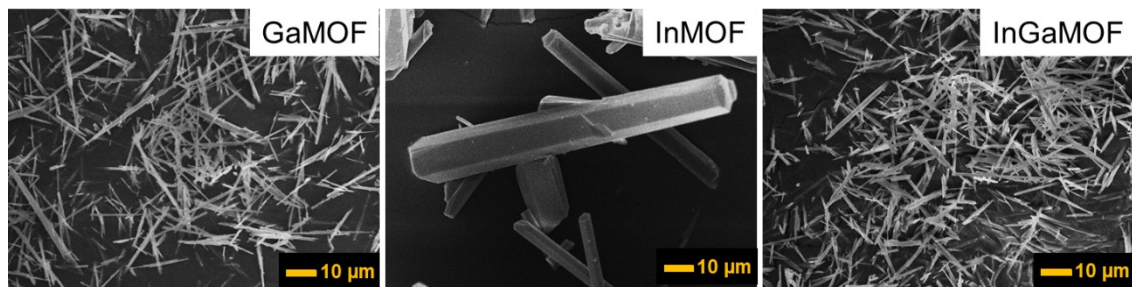

2

3 **Fig. S9** The SEM image of GaMOF, InMOF, and InGaMOF(5:1).

4

5

6

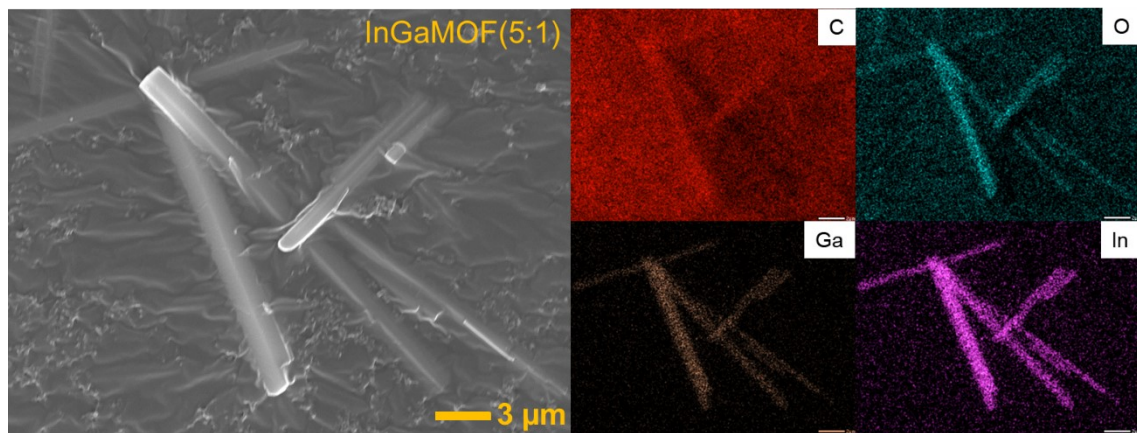

7

8 **Fig. S10** The SEM and EDX mapping images of InGaMOF(5:1).

9

10

11

12

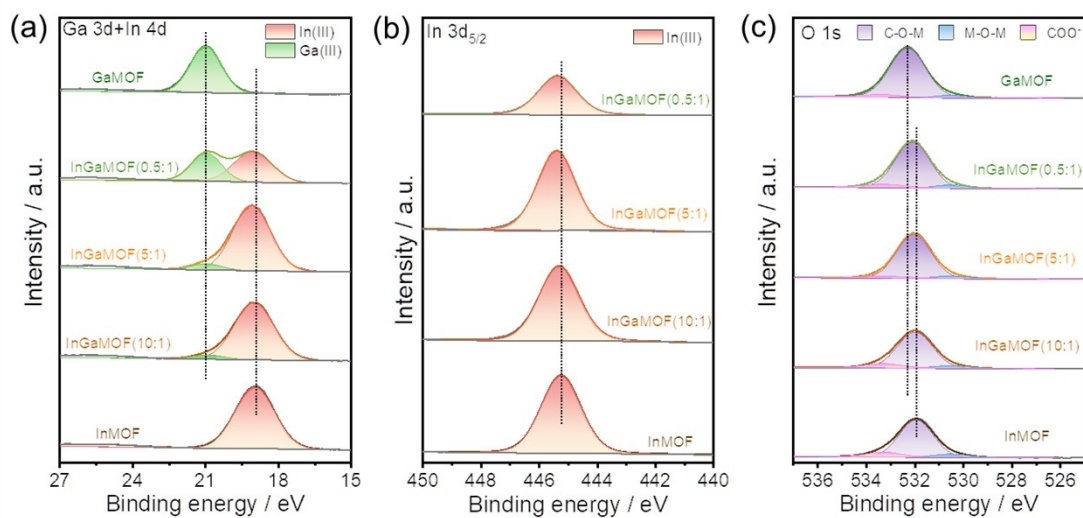

13

14 **Fig. S11** High resolution XPS spectra for GaMOF, InMOF, and InGaMOFs with different

15 In/Ga ratios.; (a) Ga 3d + In 4d, (b) In 3d, and (c) O 1s.



1

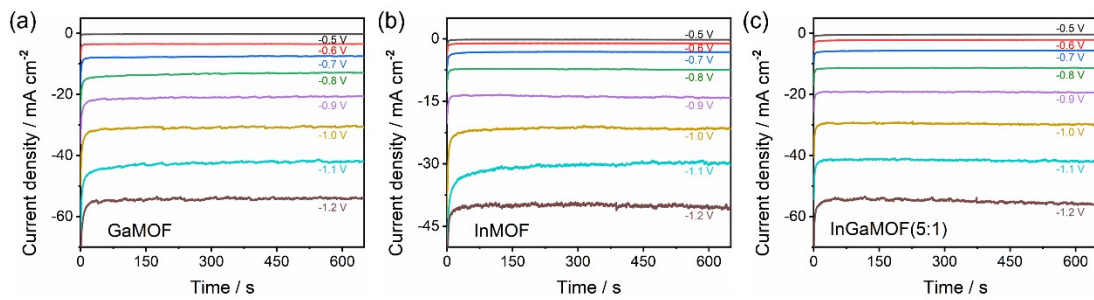

2

3 **Fig. S12** The i-t curves of GaMOF, InMOF, and InGaMOF(5:1) in CO<sub>2</sub>-saturated 0.5 M  
4 KHCO<sub>3</sub>.

5

6

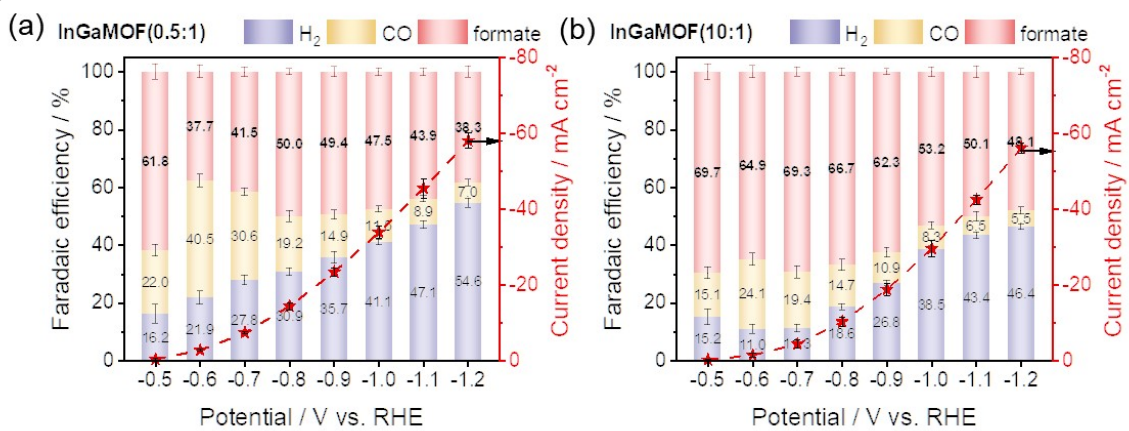

7 **Fig. S13** FEs of product distributions and current density at different applied potentials of  
8 InGaMOF(0.5:1) and InGaMOF(10:1).

9

10

11

12

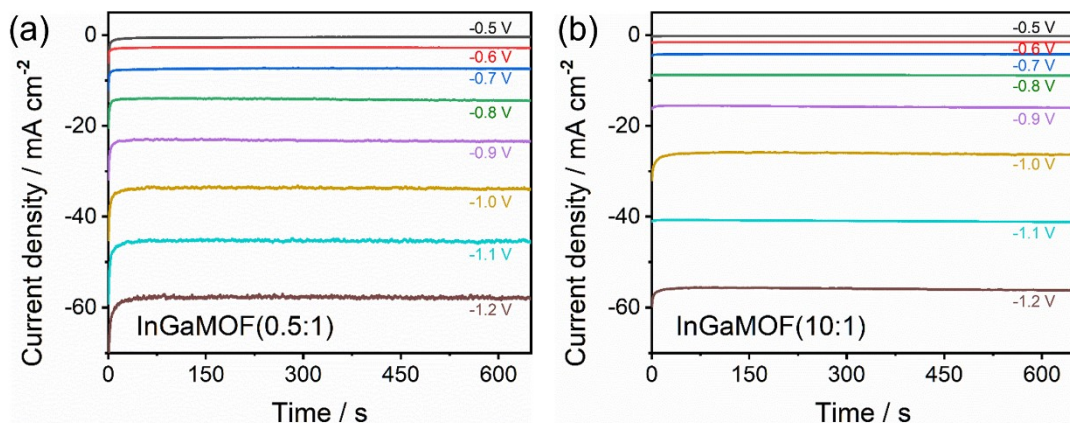

13 **Fig. S14** The i-t curves of InGaMOF(0.5:1) and InGaMOF(10:1) in CO<sub>2</sub>-saturated 0.5 M  
14 KHCO<sub>3</sub>.

15

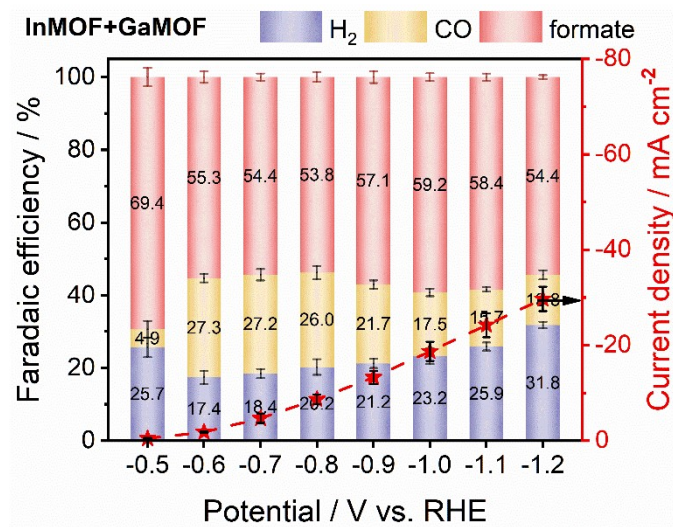

1  
 2 **Fig. S15** FEs of product distributions and current density at different applied potentials of  
 3 physical mixture sample with In-MOF and Ga-MOF.  
 4  
 5

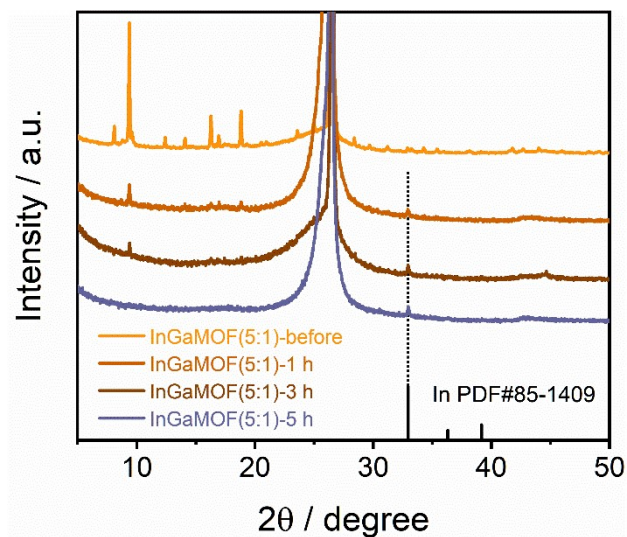

6 **Fig. S16** XRD patterns for InGaMOF(5:1) during the eCO<sub>2</sub>RR test.  
 7



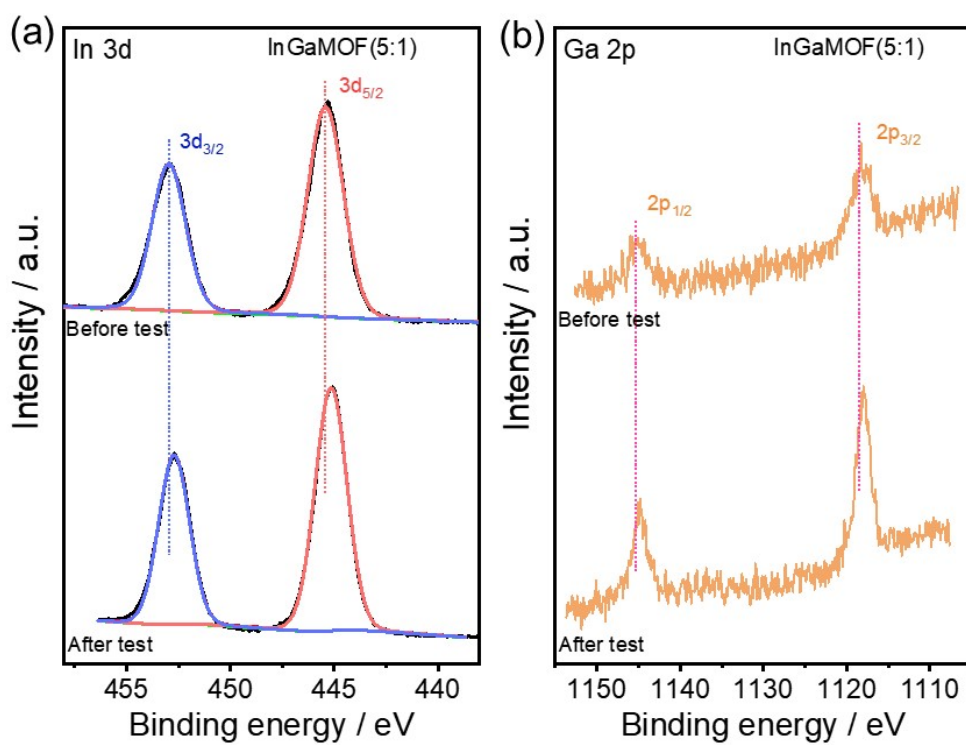

1 **Fig. S17** High resolution XPS spectra for InGaMOF(5:1) after eCO<sub>2</sub>RR test.

2  
3  
4  
5  
6

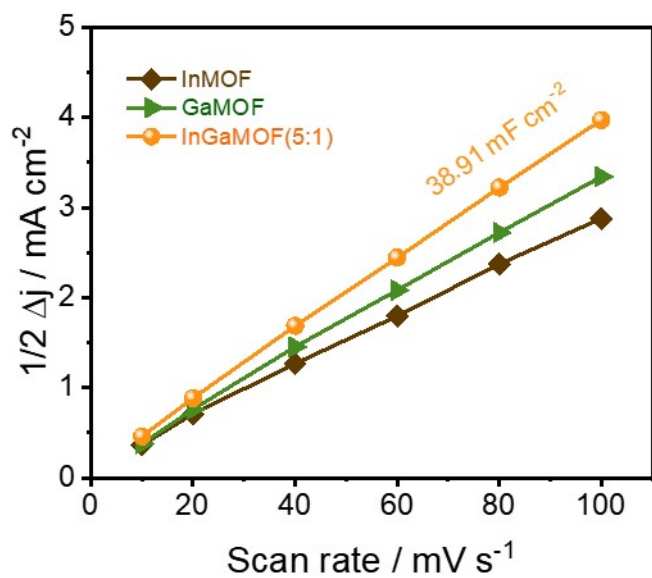

7

8 **Fig. S18**  $C_{dl}$  of GaMOF, InMOF, and InGaMOF(5:1).

1

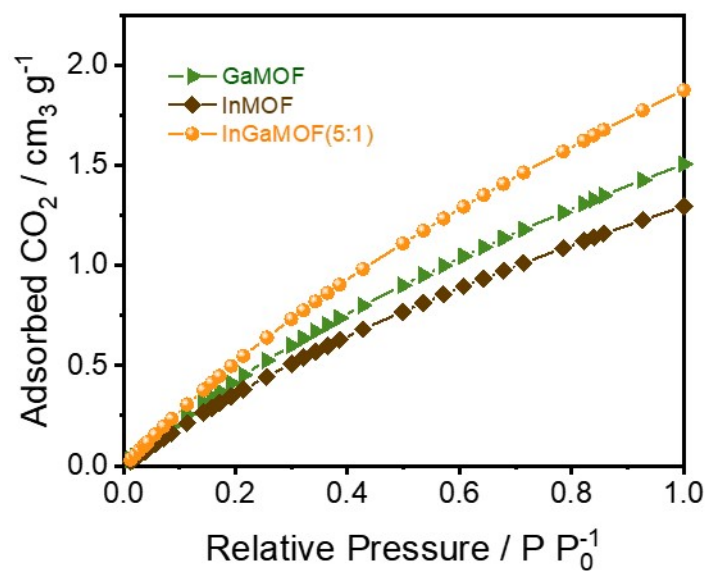

2 **Fig. S19** CO<sub>2</sub> adsorption isotherms of GaMOF, InMOF, and InGaMOF(5:1) at 298 K.

3

4

5

6

7

8

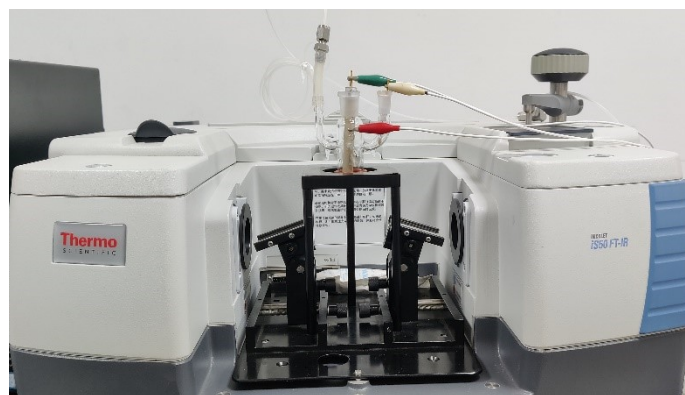

9

10 **Fig. S20** The *in-situ* FTIR apparatus diagram.

11

1 **Table S1** Mass fractions of In and Ga in the solution after ion exchange.

| Element | Sample volume | Mass fraction |
|---------|---------------|---------------|
| Ga      | 2 mL          | 0.002%        |
| In      | 2 mL          | 0.0136%       |

2

3 **Table S2** The amount of reactant material

|                | InGaMOF(0.5:1) | InGaMOF(5:1) | InGaMOF(10:1) | InMOF |
|----------------|----------------|--------------|---------------|-------|
| GaMOF / mg     | 200            | 200          | 200           | 0     |
| In(III) / mmol | 0.5            | 5            | 10            | 3     |
| PTA / mmol     | 3.6            | 3.6          | 3.6           | 3.6   |

4

5 **Table S3** Molar ratios of In and Ga in the InGaMOFs.

|       | InGaMOF(0.5:1) |         | InGaMOF(5:1) |         | InGaMOF(10:1) |         |
|-------|----------------|---------|--------------|---------|---------------|---------|
|       | Feed           | ICP-OES | Feed         | ICP-OES | Feed          | ICP-OES |
| In/Ga | 0.5:1          | 0.64:1  | 5:1          | 6.52:1  | 10:1          | 8.21:1  |

6

7 **Table S4** The BET values of MOFs.

|                                                            | InMOF  | GaMOF  | InGaMOF(5:1)   | InMOF+GaMOF |
|------------------------------------------------------------|--------|--------|----------------|-------------|
| BET Specific Surface Area / m <sup>2</sup> g <sup>-1</sup> | 407.03 | 801.88 | <b>1509.72</b> | 726.79      |

8 The physically mixed 200 mg InMOF and 20 mg GaMOF is noted as InMOF+GaMOF. The In/Ga  
9 mole ratios of InGaMOF(5:1) and InMOF+GaMOF are equal.

10

11 **Table S5** Summary of formate production efficacy of different In-based  
12 electrocatalysts reported in literature.

| Catalysts                               | FE <sub>formate</sub> | Potential (V vs.RHE) | Ref              |
|-----------------------------------------|-----------------------|----------------------|------------------|
| <b>InGaMOF(5:1)</b>                     | <b>93.0%</b>          | <b>-0.5</b>          | <b>This work</b> |
| InO <sub>x</sub> -O <sub>v</sub>        | 90.2%                 | -0.7                 | 1                |
| Sn doped In <sub>2</sub> O <sub>3</sub> | 87.0%                 | -0.8                 | 2                |
| InN-C                                   | 92.2%                 | -0.8                 | 3                |
| mesoporous-In                           | 90.0%                 | -1.05                | 4                |

|                                                    |        |       |    |
|----------------------------------------------------|--------|-------|----|
| Cu <sub>x</sub> In <sub>y</sub> -OH                | 85.0%  | -1.1  | 5  |
| In-N-C                                             | 80.0%  | -0.8  | 6  |
| In/ZnO@C                                           | 90.0 % | -1.2  | 7  |
| In@InO <sub>x</sub>                                | 94.0%  | -1.0  | 8  |
| In <sub>2</sub> S <sub>3</sub> -RGO                | 91.0%  | -1.2  | 9  |
| C@In <sub>2</sub> O <sub>3</sub> @Bi <sub>50</sub> | 90.0%  | -1.36 | 10 |
| F doped In(OH) <sub>3</sub>                        | 92.5%  | -1.2  | 11 |
| In@MWCNTs                                          | 90.0%  | -1.0  | 12 |
| In <sub>2</sub> O <sub>3</sub> -O <sub>v</sub>     | 91.2%  | -1.27 | 13 |
| InOOH-O <sub>v</sub>                               | 92.6%  | -0.85 | 14 |

1

## 2 References

- 3 1. J. Zhang, R. Yin, Q. Shao, T. Zhu and X. Huang, *Angew. Chem. Int. Ed.*, 2019, **58**,  
4 5609-5613.
- 5 2. H.-R. M. Jhong, U. O. Nwabara, S. Shubert-Zuleta, N. S. Grundish, B. Tandon, L.  
6 C. Reimnitz, C. M. Staller, G. K. Ong, C. A. Saez Cabezas, J. B. Goodenough, P.  
7 J. A. Kenis and D. J. Milliron, *Chem. Mater.*, 2021, **33**, 7675-7685.
- 8 3. P. Hou, X. Wang and P. Kang, *Journal of CO<sub>2</sub> Utilization*, 2021, **45**, 101449-  
9 101457.
- 10 4. L. Xiao, X. Liu, R. Zhou, T. Zhang, R. Zhou, B. Ouyang, E. Kan, P. J. Cullen, K.  
11 Ostrikov and X. Tu, *Energy Convers. Manag.*, 2021, **231**, 113847-113857.
- 12 5. Q. Xie, G. O. Larrazábal, M. Ma, I. Chorkendorff, B. Seger and J. Luo, *J. Energy*  
13 *Chem.*, 2021, **63**, 278-284.
- 14 6. P. Lu, X. Tan, H. Zhao, Q. Xiang, K. Liu, X. Zhao, X. Yin, X. Li, X. Hai, S. Xi, A.  
15 T. S. Wee, S. J. Pennycook, X. Yu, M. Yuan, J. Wu, G. Zhang, S. C. Smith and Z.  
16 Yin, *ACS Nano*, 2021, **15**, 5671-5678.
- 17 7. X. Teng, Y. Niu, S. Gong, M. Xu, X. Liu, L. Ji and Z. Chen, *Mater. Chem. Front*,  
18 2021, **5**, 6618-6627.
- 19 8. Y. Yang, J.-j. Fu, T. Tang, S. Niu, L.-B. Zhang, J.-n. Zhang and J.-S. Hu, *Chinese*

- 1     *J. Catal.*, 2022, **43**, 1674-1679.
- 2 9. H. Ning, X. Fei, Z. Tan, W. Wang, Z. Yang and M. Wu, *ACS Appl. Nano Mater.*,  
3     2022, **5**, 2335-2342.
- 4 10. J. Zhai, Y. Hu, M. Su, J. Shi, H. Li, Y. Qin, F. Gao and Q. Lu, *Small*, 2023, **19**,  
5     2206440-2206451.
- 6 11. X. An, S. Li, Z. Yang, X. Ma, X. Hao, A. Abudula and G. Guan, *Chem. Eng. J.*,  
7     2023, **455**, 140720-140729.
- 8 12. L. Xiao, R. Zhou, T. Zhang, X. Wang, R. Zhou, P. J. Cullen and K. Ostrikov,  
9     *Energy Environ. Mater.*, 2023, **0**, e12656.
- 10 13. Q. Cheng, M. Huang, L. Xiao, S. Mou, X. Zhao, Y. Xie, G. Jiang, X. Jiang and F.  
11     Dong, *ACS Catal.*, 2023, **13**, 4021-4029.
- 12 14. F. Ye, S. Zhang, Q. Cheng, Y. Long, D. Liu, R. Paul, Y. Fang, Y. Su, L. Qu, L.  
13     Dai and C. Hu, *Nat. Commun.*, 2023, **14**, 1-14.
- 14
